# Supplementary material
Source: PubMed Central journal article supplement (PMC10415941)
Supplement: NIHMS1922055-supplement-Supplementary_Material.pdf [file NIHMS1922055-supplement-Supplementary_Material.pdf]

## Supplementary Material

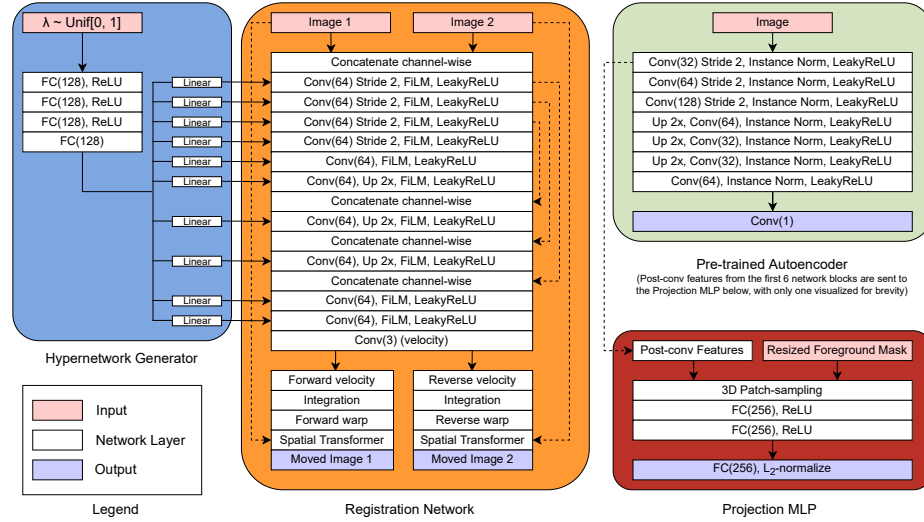

**Fig. 1. Low-level architectures** used in this paper. Connections between the registration network, autoencoder, and projection MLPs correspond to Figure 1 in the main text. Every convolution uses a 3x3x3 kernel size. LeakyReLU slopes set to 0.2.

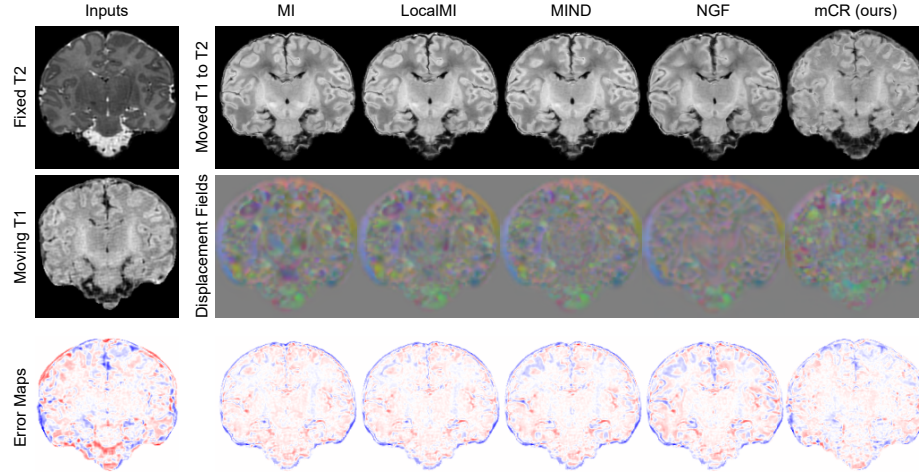

**Fig. 2. Coronal view of T1w-T2w registration** between arbitrarily selected subjects for the ch=64 models. Error maps computed w.r.t. the T1w MRI of the target subject. Hypernetwork registration models are sampled with the same  $\lambda$  as Table 1 (main text).

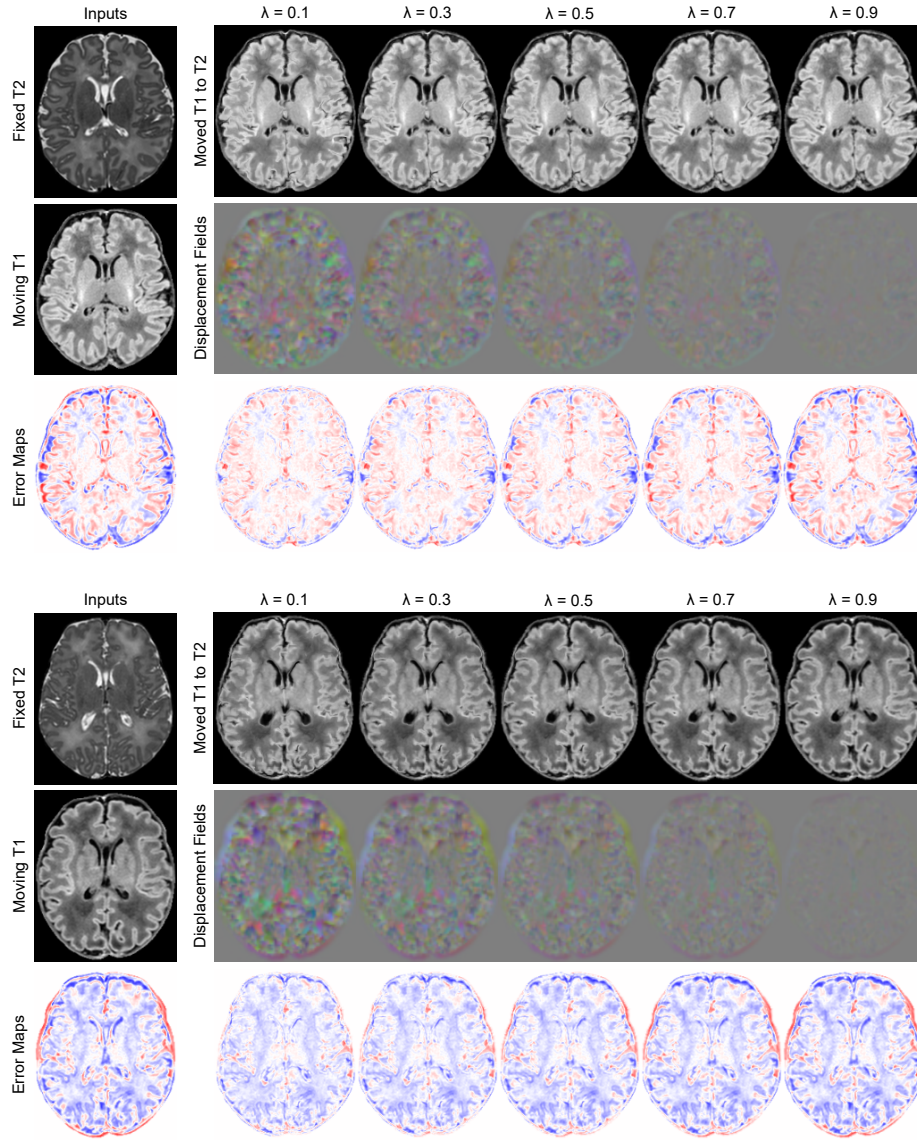

**Fig. 3. Hypernetwork T1w-T2w registration.** Leftmost column: Arbitrarily selected input images to register. Remaining columns: Registration results in ascending order of regularization strengths ( $\lambda$ ). As  $\lambda$  increases, deformation energies reduce and regularity increases, at the cost of increased image mismatch.
